# Supplementary material
Source: PubMed Central journal article supplement (PMC11028475)
Supplement: 262_2016_1860_MOESM1_ESM.pdf [file 262_2016_1860_MOESM1_ESM.pdf]

**Search strings used to retrieve relevant studies from (a) PubMed, (b) Embase and (c) congress abstracts**

**a) PubMed search strategy**

("granulocyte-macrophage colony-stimulating factor"[MeSH Terms] OR ("granulocyte-macrophage"[All Fields] AND "colony-stimulating"[All Fields] AND "factor"[All Fields]) OR ("granulocyte-macrophage colony-stimulating factor"[All Fields]) OR ("gm"[All Fields] AND "csf"[All Fields]) OR "gm csf"[All Fields] OR "GM-CSF"[All Fields] OR "GMCSF"[All Fields]) AND ("melanoma"[MeSH Terms] OR "melanoma"[All Fields])

Limits: Human; English language; publication date 01/01/2000–01/05/2015

**b) Embase search strategy**

| #  | Search                                                                                                                                    |
|----|-------------------------------------------------------------------------------------------------------------------------------------------|
| 1  | granulocyte macrophage colony stimulating factor/                                                                                         |
| 2  | GM-CSF.mp.                                                                                                                                |
| 3  | granulocyte-macrophage.mp.                                                                                                                |
| 4  | colony-stimulating.mp.                                                                                                                    |
| 5  | factor.mp.                                                                                                                                |
| 6  | 3 and 4 and 5                                                                                                                             |
| 7  | gm.mp.                                                                                                                                    |
| 8  | csf.mp.                                                                                                                                   |
| 9  | 7 and 8                                                                                                                                   |
| 10 | gm csf.mp.                                                                                                                                |
| 11 | gmcsf.mp.                                                                                                                                 |
| 12 | melanoma/or metastatic melanoma/ or melanoma skin cancer/or cutaneous melanoma/or melanoma.mp. or melanoma vaccine/or melanoma metastasis |
| 13 | 1 or 6                                                                                                                                    |
| 14 | 9 or 13                                                                                                                                   |
| 15 | 10 or 11 or 14                                                                                                                            |
| 16 | 2 or 15                                                                                                                                   |
| 17 | 12 and 16                                                                                                                                 |
| 18 | limit 17 to (human and English language and yr="2000 –May 2015" and (adult <18 to 64 years> or aged <65+ years>))                         |

**c) Search terms used to interrogate congress proceedings**

Granulocyte-macrophage colony-stimulating factor, GM-CSF, melanoma
